# Supplementary material for: Current Knowledge and Perception of Edible Grasshopper/Locusts’ Consumption in Western Kenya
Source: Hindawi journal article supplement (doi:10.1155/2023/7034224), 2023-10-17
Supplement: f1 [file 7034224.f1.pdf]

## SUPPLEMENTARY MATERIAL: QUESTIONNAIRE

Below is the questionnaire that was used during the survey study in the western region of Kenya. This was a face-to-face interview where respondents could be asked the questions while the interviewee filled in the answers given.

### QUESTIONNAIRE

---

#### Introduction

This survey questionnaire aims to assess the knowledge, culture, availability, perception and acceptance of edible acridids in Western Kenya. Also, the survey wants to investigate the willingness of the respondents to rear them if shown and hence be able to sale and earn some income from them. In this survey, you will be asked some questions about your views on the consumption of edible grasshoppers/locusts as food and feed.

All information given will be treated with absolute confidentiality. Your COOPERATION in this study is therefore highly appreciated.

This interview will take between 5-10 minutes only. Thanks for your time and corporation.

---

#### 1.1 Demographical data *(Please tick (✓) or fill in the blank spaces as appropriate).*

1. Give information on the following about your location

County.....Constituency.....Ward.....Sub location.....

2. Could you please fill in your details in the boxes below?

Age: 18-30 [ ]      31-40 [ ]      41-50 [ ]      51+ [ ]

3. Gender: Female [ ]      Male [ ]

4. What is your Education level:

None [ ]      Primary [ ]      Secondary [ ]      Tertiary [ ]

5. What is your occupation

.....

**SECTION B**

**1.2 General knowledge and information about edible grasshoppers/locusts**

**Questions on the familiarity of edible grasshoppers/locusts as food**

1. i) Have you ever heard about people eating grasshoppers/locust?

YES [ ] NO [ ]

ii) If YES, what type of edible grasshopper/locust do you know {refer to picture catalog}  
(give name(s) if known)

.....

2. Have you ever eaten/tried eating any before as part of your diet?

YES [ ] NO [ ]

i) If YES, did you like it

YES [ ] NO [ ]

ii) If YES, how often have you eaten/tested them? (tick (√) one)

|                                              |  |
|----------------------------------------------|--|
| I have tried on a single occasion            |  |
| I have tried on a few occasions              |  |
| I eat them occasionally (when in season)     |  |
| I eat them regularly(at least once per week) |  |

iii) Who introduced you to eating edible grasshoppers/locust? (tick (√) one)

Friends [ ]

Relatives [ ]

Self [ ]

Any other.....

iv) If not eaten before, would you consider to try eating them?

Yes [ ]

Maybe [ ]

No [ ]

- v) If not eaten, would it help if the whole insect was for example (*Please feel free to choose (✓) more than 1 in the table below?*)

|                                            |  |
|--------------------------------------------|--|
| Covered in Chocolate bar                   |  |
| The whole insect Mixed into food like rice |  |
| Grounded and mixed in cakes, bread         |  |
| Grounded and mixed in porridge flour       |  |
| Eaten as an extract e.g. protein isolate   |  |

### 1.3 Question on availability of edible grasshoppers/locusts

- i) What time of the year do you normally see many grasshoppers/locusts?  
 .....
- ii) Have you ever bought any edible grasshoppers/locust before?  
**YES** [ ]  
**NO** [ ]
- iii) If **NO** what could be the reason(s) for not buying?.....
- iii) If **NO** and you come across them in the market will you consider buying them?  
**YES** [ ]      **NO** [ ]      **MAYBE** [ ]
- iv) What traditional methods do you normally use to harvest grasshoppers/locusts?  
 .....
- vi) What plants do you think that grasshoppers/locusts like feeding on  
 .....

#### 1.4 Question on disgust and perception about grasshoppers as food

i) What is your feeling about consuming edible grasshoppers/locusts as food? (Please chose one in each)

| <b>Question on disgust and perception</b>                               | Strongly agree | Agree | Neutral | Strongly disagree | Disagree |
|-------------------------------------------------------------------------|----------------|-------|---------|-------------------|----------|
| The idea of eating grasshoppers/locust makes me nauseous                |                |       |         |                   |          |
| The idea of eating grasshoppers/locust make me sick                     |                |       |         |                   |          |
| Eating grasshoppers/locust is disgusting                                |                |       |         |                   |          |
| If a grasshopper/locust crawls on my favourite food I won't eat it      |                |       |         |                   |          |
| I fear that grasshopper/locust based food has negative taste properties |                |       |         |                   |          |
| I believe eating grasshoppers/locust is not part of our culture         |                |       |         |                   |          |

ii) Using a scale of 1 to 5; where: 1= highly preferred, 2=significantly preferred, 3=moderately preferred, 4=least preferred, 5=not preferred, please rank the following preparation/ cooking methods of edible grasshoppers/locusts according to your preference.

| <b>Cooking/processing methods</b>                 | <b>1</b> (highly preferred) | <b>2</b> (significantly preferred) | <b>3</b> (moderately preferred) | <b>4</b> (least preferred) | <b>5</b> (not preferred) |
|---------------------------------------------------|-----------------------------|------------------------------------|---------------------------------|----------------------------|--------------------------|
| Eating them raw                                   |                             |                                    |                                 |                            |                          |
| Salting, then boiling                             |                             |                                    |                                 |                            |                          |
| Salting, then deep-frying                         |                             |                                    |                                 |                            |                          |
| Salting, Pan-Fried and sun drying                 |                             |                                    |                                 |                            |                          |
| Smoking/roasting                                  |                             |                                    |                                 |                            |                          |
| Ground and mixed with flour (for porridge, bread) |                             |                                    |                                 |                            |                          |

**1.5. Questions on perceived acceptance of edible grasshopper as food and feed**

- i) If you are shown how to rear grasshoppers/locust, would you rear them?  
 YES [ ]                    MAYBE [ ]                    NO [ ]
- ii) What will be your purpose for rearing them? (feel free to *chose* (✓) *more than one*)  
 For food [ ]    For feed [ ]    For sale [ ]  
 Any other.....
- iii) If you were to rear and sale them, in what form will you sale them (*feel free to chose* (✓) *more than 1*)  
 Raw [ ]    Roasted [ ]    Fried [ ]    Any other.....
- iv) Using a scale of 1 to 5, where: 1= highly preferred, 2= significantly preferred, 3= moderately preferred, 4= least preferred, 5=not preferred, please rank the following reasons for rearing grasshoppers according to your preference.

| <b>Preference</b>                | <b>1</b> (highly preferred) | <b>2</b> (significantly preferred) | <b>3</b> (moderately preferred) | <b>4</b> (least preferred) | <b>5</b> (not preferred) |
|----------------------------------|-----------------------------|------------------------------------|---------------------------------|----------------------------|--------------------------|
| Food for man                     |                             |                                    |                                 |                            |                          |
| Feed for livestock (e.g cattle)  |                             |                                    |                                 |                            |                          |
| Feed for chicken                 |                             |                                    |                                 |                            |                          |
| Feed for fish                    |                             |                                    |                                 |                            |                          |
| Feed for pets and museum animals |                             |                                    |                                 |                            |                          |

Thanks for information and time taken in completing this questionnaire.
